# Supplementary material for: Solvent-Free Synthesis of SAPO-34 Zeolite with Tunable SiO2/Al2O3 Ratios for Efficient Catalytic Cracking of 1-Butene
Source: MDPI journal article supplement (doi:10.3390/catal11070835), 2021-07-10
Supplement: s1 [file s1]

## ***Supplementary Information***

### **Solvent-free Synthesis of SAPO-34 Zeolite with Tunable SiO<sub>2</sub>/Al<sub>2</sub>O<sub>3</sub> Ratios for Efficient Catalytic Cracking of 1-Butene**

Xia Xiao <sup>1</sup>, Zhongliang Xu <sup>1</sup>, Peng Wang <sup>1</sup>, Xinfei Liu <sup>1</sup>, Xiaoqiang Fan <sup>1</sup>, Lian Kong <sup>1</sup>, Zean Xie <sup>1</sup> and Zhen Zhao <sup>1,2\*</sup>

<sup>1</sup> Institute of Catalysis for Energy and Environment, College of Chemistry and Chemical Engineering, Shenyang Normal University, Shenyang 110034, PR. China;

<sup>2</sup> State Key Laboratory of Heavy Oil Processing, China University of Petroleum, Beijing, Beijing 102249, PR. China;

**\*Correspondence:** zhenzhao@cup.edu.cn; Tel.: +86-24-86579800

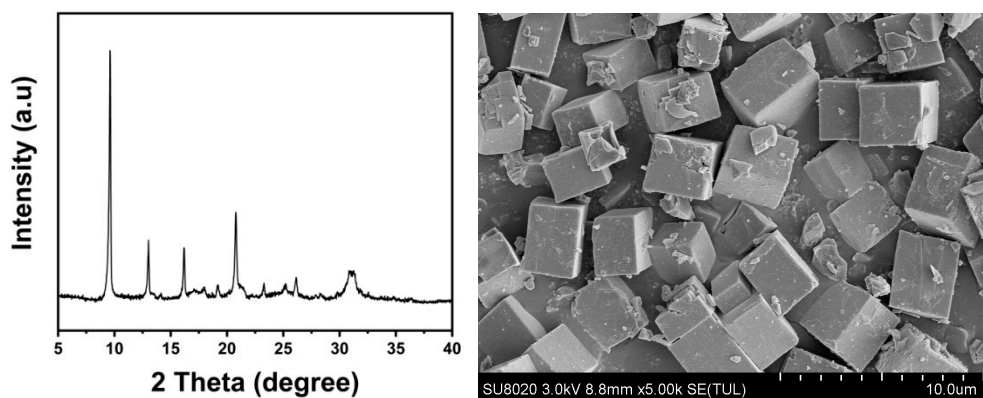

**Figure S1.** The XRD pattern (left) and SEM image (right) of commercial SAPO-34.

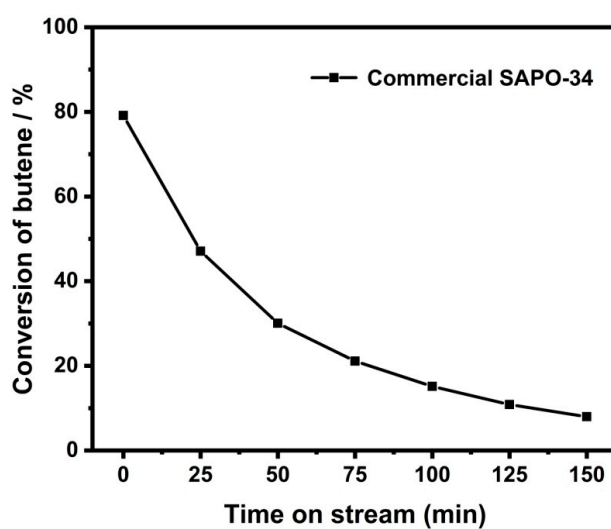

**Figure S2.** The conversion of 1-butene for commercial SAPO-34 catalysts with time on stream. Reaction conditions: WHSV=1.5 h<sup>-1</sup>, P=0.1 Mpa, T=500 °C

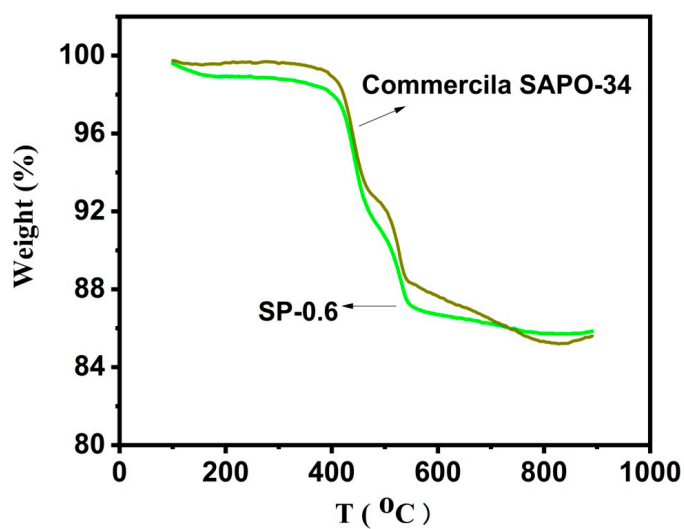

**Figure S3.** TG profiles of coked SP-0.6 catalyst and commercial SAPO-34 at 150 min.

Table S1. Product distribution of 1-butene catalytic cracking over commercial SAPO-34.

| Catalysts             | Conversion<br>(wt%) | Selectivity (wt%)                               |                |                               |                               |                                                               |                  |      | HTC <sup>1</sup> | Mass<br>conservation <sup>2</sup> |
|-----------------------|---------------------|-------------------------------------------------|----------------|-------------------------------|-------------------------------|---------------------------------------------------------------|------------------|------|------------------|-----------------------------------|
|                       |                     | CH <sub>4</sub> + C <sub>2</sub> H <sub>6</sub> | H <sub>2</sub> | C <sub>2</sub> H <sub>4</sub> | C <sub>3</sub> H <sub>6</sub> | C <sub>3</sub> H <sub>8</sub> +C <sub>4</sub> H <sub>10</sub> | C <sub>5</sub> + |      |                  |                                   |
| Commercial<br>SAPO-34 | 79.2                | 0.7                                             | 0.6            | 13.1                          | 46.3                          | 26.5                                                          | 12.6             | 0.57 |                  | 97.3%                             |

Reaction conditions: WHSV=1.5 h<sup>-1</sup>, P=0.1 Mpa, T=500 °C, TOS=10 min; <sup>1</sup>HTC: The hydrogen transfer coefficient was defined as the ratio of selectivity of C<sub>3</sub>H<sub>8</sub> plus C<sub>4</sub>H<sub>10</sub> with respect to selectivity of C<sub>3</sub>H<sub>6</sub>.

<sup>2</sup> **The calculation of mass conservation:** In this study, the H/C and N/C molar ratios of the 1-butene cracking products are calculated by formulas (1) and (2) to analysis the conservation of elements. When these two parameters are significantly lower than the theoretical values (H/C and N/C molar ratio of 1-butene), it indicates that there is obvious carbon atom loss and the undetectable C5+ fraction is formed.

$$\frac{H}{C} = \frac{\sum m(i)}{\sum n(i)} \quad (1)$$

$$\frac{N}{C} = \frac{2(N_2)}{\sum n(i)} \quad (2)$$

Where, (i) represent the mole composition analyzed by GC of i product in the output. (N<sub>2</sub>) represents the mole composition analyzed by GC of nitrogen in the output. m and n represents the H atoms numbers and C atoms numbers of i product in the output, respectively.
